# Supplementary material for: Mesoporous silica–chondroitin sulphate hybrid nanoparticles for targeted and bio-responsive drug delivery
Source: Royal Society of Chemistry journal article supplement (doi:10.1039/c4nj01430h), 2014-12-15
Supplement: c4nj01430h1.pdf [file c4nj01430h1.pdf]

## Supplementary Information

### Mesoporous Silica - Chondroitin Sulphate Hybrid Nanoparticles for Targeted and Bio-responsive Drug Delivery

Krishna Radhakrishnan<sup>a</sup>, Jasaswini Tripathy<sup>ab</sup>, Akshay Datey<sup>b</sup>, Dipshikha chakravortty<sup>b</sup>, Ashok M. Raichur<sup>\*ac</sup>

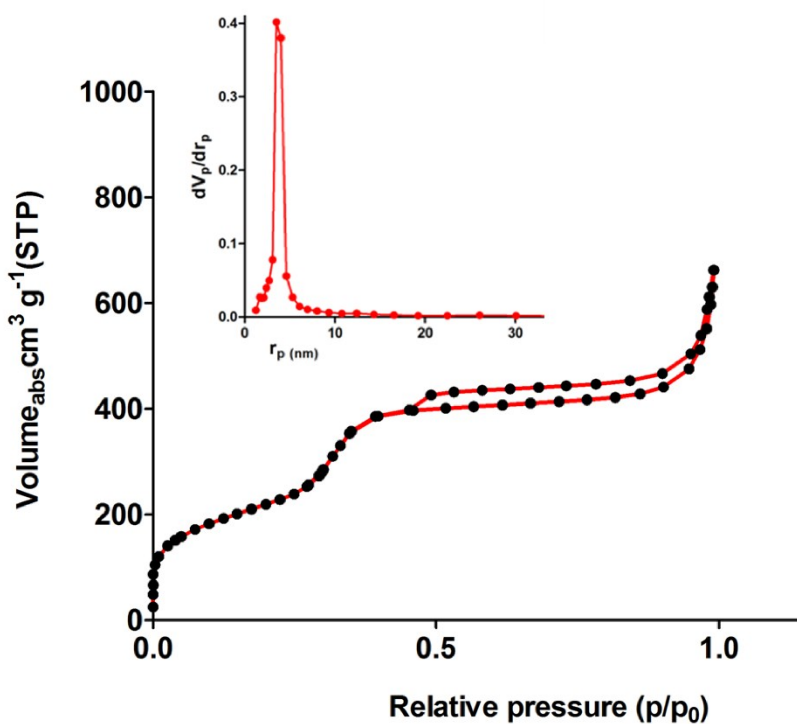

Figure S1. The N<sub>2</sub> adsorption-desorption isotherms of the MSN and BJH pore size distribution of MSNs.

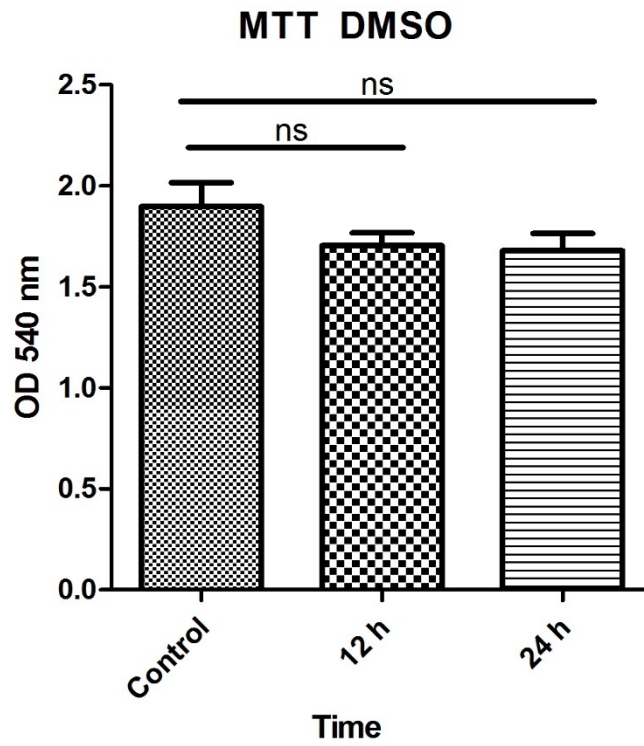

Figure S2. Result of the control experiment to study the effect of DMSO on HeLa cells. DMSO concentrations in the final media was adjusted to match the highest concentration of DMSO in the experiments. MTT results indicate that DMSO is not having any significant effect on the cell viability ( based on paired t test)
